1 **Interplay between polygenic effects and polypharmacy**  
2 **on dementia: An investigation in an elderly Scottish**  
3 **cohort.**

4 Vasilis Raptis<sup>1,2†</sup>, Donncha Mullin<sup>3,5</sup>, Sumbul Syed<sup>6</sup>, Ian J Deary<sup>4,7</sup>, Simon R  
5 Cox<sup>4,7</sup>, Tom C Russ<sup>3,5,7</sup>, Michelle Luciano<sup>4</sup>

6

7 <sup>1</sup>The Roslin Institute, College of Medicine and Veterinary Medicine, University of  
8 Edinburgh

9 <sup>2</sup>Advanced Care Research Centre, School of Engineering, University of  
10 Edinburgh

11 <sup>3</sup>Alzheimer Scotland Dementia Research Centre, University of Edinburgh

12 <sup>4</sup>Department of Psychology, University of Edinburgh

13 <sup>5</sup>Division of Psychiatry, Centre for Clinical Brain Sciences, University of  
14 Edinburgh

15 <sup>6</sup>School of Health in Social Science, University of Edinburgh

16 <sup>7</sup>Lothian Birth Cohorts, University of Edinburgh

17

18 † Corresponding author:

19 Vasilis Raptis

20 e-mail: [V.Raptis@sms.ed.ac.uk](mailto:V.Raptis@sms.ed.ac.uk)

21

## 22 **ABSTRACT**

23 INTRODUCTION: Polygenic Risk Scores for Alzheimer dementia (AD-PRS), a  
24 measure of aggregate AD genetic risk and polypharmacy have been associated  
25 with dementia. Here, we test their interaction's association with future dementia  
26 among older adults without baseline neurodegenerative diagnoses.

27 METHODS: Using Cox proportional hazards and mortality-adjusted competing  
28 risk regression models we analysed up to 17.5 years all-cause incident dementia  
29 in the Lothian Birth Cohort 1936 (n=759, 105 dementia patients). We used  
30 polypharmacy (total or nervous-system-acting medications count), AD-PRS, and  
31 their interaction as main predictors.

32 RESULTS: A non-significant interaction was found between AD-PRS and total  
33 polypharmacy (HR=1.06; p=0.15) or nervous-system-acting polypharmacy  
34 (HR=0.98; p=0.86) in shaping dementia risk. Omitting interaction, mortality-  
35 adjusted models showed significant AD-PRS prediction of dementia (HR ~1.40;  
36 p<0.001), non-significant total (HR=1.03; p=0.49), and nervous-system-acting  
37 polypharmacy effects (HR=1.27; p=0.069).

38 DISCUSSION: Elucidating the complex interplay between polypharmacy and  
39 genetics could improve management of inappropriate medication in older adults  
40 genetically prone to dementia/AD.

41

42 KEYWORDS: Alzheimer dementia, dementia, polygenic risk score,  
43 polypharmacy, longitudinal study, gene-environment interaction

44

## 45 **1 BACKGROUND**

46 Dementia, a condition describing the significant and progressive overall  
47 deterioration of a person's cognition with consequent deterioration in function<sup>1</sup>, is  
48 widely recognised to have multi-factorial causes, arising from the interplay  
49 between environmental, lifestyle and genetic factors<sup>2,3</sup>.

50 Alzheimer dementia (AD), the most frequent cause of dementia (accounting for  
51 70 - 80% of dementia<sup>4</sup>) has been extensively shown to have a strong genetic  
52 component<sup>5-7</sup>. Multiple genetic variants have been identified as risk factors for  
53 AD through large-scale Genome-Wide Association Studies (GWAS)<sup>5,6</sup>. The most  
54 unequivocally established AD risk gene is apolipoprotein E (*APOE*), located on  
55 chromosome 19<sup>8-11</sup>. Its coding protein, Apo-E, is an important cholesterol  
56 carrying protein, implicated in several brain functions, including lipid transfer,  
57 injury repair, neuroinflammation and others. Notably, the *APOE*  $\epsilon$ 4 allele confers  
58 a dramatic increase in AD prevalence (4 to 10 fold increase) and lower age of  
59 onset<sup>8</sup>, thus being considered an important genetic risk factor for AD.

60 Other smaller effect AD-associated genes have been implicated in multiple  
61 biological processes, including microglia involvement, tau and amyloid- $\beta$  protein  
62 metabolism regulation, immunity, inflammation, cholesterol metabolism, and  
63 neurotransmitter regulation<sup>12,13</sup>. To study the contribution of many genetic loci  
64 with small effect, Polygenic Risk Scores (PRS) are often implemented, which  
65 estimate a single aggregate score for each individual that is indicative of their  
66 genetic liability to a disease<sup>14</sup>. For AD, PRS calculated using many AD

67 associated genes have been found in several studies, with varying accuracy, to  
68 be predictive of AD risk, even without including the stronger *APOE* genetic  
69 effect<sup>5,6,10,11</sup>. Furthermore, AD-PRS have been associated with cognitive  
70 impairment in older healthy adults, as well as several AD related  
71 neurodegeneration phenotypes (e.g. neuroimaging changes)<sup>12</sup>.

72 Although individuals' genetic variation is fixed at birth, genetic effects are thought  
73 to be modified through their interactions with environmental, lifestyle or social  
74 factors throughout life. Such gene by environment (GxE) interactions have been  
75 suggested in dementia and AD<sup>3,15</sup>. Specifically for GxE interactions in dementia, it  
76 has been proposed that genetic risk for dementia can be mitigated by favourable  
77 modifiable lifestyle factors<sup>16-18</sup> (i.e., healthy diet, physical activity, non-smoking,  
78 and low alcohol consumption), although with sometimes conflicting results<sup>17</sup>. On  
79 the other hand, two randomised clinical trials<sup>19,20</sup> assessing the effect of  
80 multidomain lifestyle interventions on dementia found that *APOE*  $\epsilon$ 4 allele carriers  
81 and non-carriers had similar results, indicating no *APOE*  $\epsilon$ 4 interplay with lifestyle  
82 factors. However, most studies so far have focused only on *APOE* genetic  
83 variants for GxE interactions<sup>16,18-20</sup>.

84 Regarding AD-PRS interaction with the environment / lifestyle in shaping  
85 dementia or AD risk, less work has been done. In a Chinese cohort study<sup>15</sup>,  
86 individuals living around higher residential greenness had lower chances of  
87 cognitive impairment, with the effect being increased in those having lower PRS  
88 genetic risk, although marginally significant. In another study, conducted on a  
89 large European cohort, adherence to a healthy lifestyle did not significantly  
90 interact with AD PRS in shaping dementia risk<sup>2</sup>.

91 Polypharmacy, a term indicating that someone takes multiple medications, is  
92 highly prevalent in older adults with multiple chronic conditions<sup>21,22</sup>. It has been  
93 demonstrated that polypharmacy is associated with unfavourable outcomes, such  
94 as increased frequency of falls, increased hospitalisation and hospital  
95 readmission, adverse drug reactions and increased mortality<sup>21,23</sup>. Harmful  
96 polypharmacy effects may arise due to drug-drug and drug-disease interactions,  
97 especially in older people who have a reduced ability to metabolise drugs<sup>24</sup>.  
98 Specifically for dementia, the role of polypharmacy as a risk factor is less  
99 known<sup>25</sup>. It has been estimated that polypharmacy burden is higher than the  
100 general population, given the higher number of comorbid physical conditions in  
101 dementia patients<sup>22,26</sup>, and polypharmacy in people with dementia has been  
102 associated with increased emergency hospitalisation and mortality<sup>27</sup>.

103 Whether the effect of polypharmacy on dementia risk can be modulated by  
104 genetic factors is not known. In the present study, it is hypothesised that  
105 individuals exposed to polypharmacy have an increased dementia risk if they also  
106 have a high genetic risk profile, compared to individuals with a low genetic risk  
107 profile. This hypothesis is based on the idea that biological pathways which may  
108 be disrupted by drug-disease and drug-drug interactions are also affected by the  
109 genetic variants that lead to dementia pathology. For example, anticholinergic  
110 drugs, acting on acetylcholine neurotransmitters, have been found to increase  
111 dementia risk, adverse outcomes, and are frequent in dementia patients with  
112 polypharmacy<sup>22,28</sup>. At the same time, acetylcholine neurotransmission-related  
113 genes (e.g. *RAB10* gene) have been linked with AD pathogenesis<sup>13</sup>. In this study,  
114 the proposed hypothesis is addressed in a longitudinal Scottish cohort of older

115 adults, who were relatively healthy and dementia-free at the baseline age of 70  
116 years. Specifically, an interaction effect between Alzheimer Disease Polygenic  
117 Risk Scores and the number of (1) total and (2) nervous system active baseline  
118 drugs is tested in terms of predicting dementia up to 17.5 years of follow-up.

119

## 120 **2 METHODS**

### 121 **2.1 Dataset description**

122 The present analysis was conducted on the Lothian Birth Cohort 1936 (LBC1936)  
123 dataset<sup>29</sup>. This is a longitudinal study, designed as a follow-up to the Scottish  
124 Mental Survey of 1947 (SMS1947), an intelligence test conducted on pupils aged  
125 11 years old across Scotland<sup>30</sup>. From 2004 to 2007, LBC1936 recruited 1,091  
126 participants of the SMS1947, then aged around 70 years old, and mostly living in  
127 Lothian at that time<sup>29</sup>. Since it focussed on 'normal' cognitive ageing initially, no  
128 participants had a diagnosis of dementia at baseline. After this first wave of  
129 recruitment, participants were re-invited to the study every three years (at mean  
130 ages: 73, 76, 79 and 82 years) for follow-up testing, termed Waves 1 to 5  
131 respectively. Wave 6 has recently finished, but data is not yet available. At each  
132 wave, a wealth of data has been collected from questionnaires, blood tests,  
133 physical, medical and cognitive measurements. In addition, participants who have  
134 consented to do so, have been linked to their electronic health record to obtain  
135 further information about their health status (e.g., disease diagnoses, hospital  
136 visits). Detailed descriptions of the LBC1936 have been previously  
137 reported<sup>29,31,32</sup>. For this analysis, information from Wave 1 has been utilised,

138 regarding: participants' demographic characteristics, genetic data and self-  
139 reported medication usage and medical conditions. The analysis was conducted  
140 on 759 individuals (105 dementia patients, 654 controls) for whom complete  
141 genetic data (including *APOE* gene alleles) and ascertained dementia outcome  
142 as of August 2022 (see "Outcome: incident dementia" section) were available.

## 143 **2.2 LBC1936 genetic data**

144 During Wave 1 of the LBC1936, genome-wide genotyping and genotyping of the  
145 Apolipoprotein E variants ( $\epsilon 2$ ,  $\epsilon 3$ , and  $\epsilon 4$  alleles) was performed<sup>29,32</sup> for 1,005  
146 individuals. Genotyping of approximately 500,000 genetic variants across the  
147 genome (Single Nucleotide Polymorphisms, SNPs) was done using the Illumina  
148 Human610-Quadv1 chip<sup>33</sup>. Furthermore, non-genotyped variants have been  
149 imputed based on the Haplotype Reference Consortium<sup>34</sup> reference panel,  
150 totalling 39 million SNPs.

151 High quality SNPs and individuals were extracted, in order to minimise  
152 genotyping and imputation errors and reduce the chance of biased results<sup>35</sup>. The  
153 quality control filters applied on genotyped data were described in Houlihan et al,  
154 2010<sup>33</sup>. In brief they included the following: One of each related pair of individuals  
155 ( $> 2^{\text{nd}}$  degree relatives, i.e., half-siblings) were excluded (n=8); 1 individual with  
156 mostly non-European descent was excluded; 12 individuals whose reported and  
157 genetically inferred sex did not match (likely indicative of errors during genotype  
158 sample preparation) were excluded, and; SNPs that were missing from more than  
159 2% of the individuals were excluded. For the present analysis, and on the  
160 genotyped and imputed data: 4,360,232 SNPs whose alleles were found in a  
161 frequency less than 1% in the cohort were excluded; 55 SNPs that deviated

162 significantly from Hardy-Weinberg Equilibrium were excluded, and; 27.7 million  
163 imputed variants with an imputation score less than 0.8 were excluded. These  
164 quality control filtering steps were performed using the PLINK(v1.9) software<sup>36,37</sup>.  
165 799 individuals remained after quality control, containing approximately 7 million  
166 SNPs. 759 individuals formed the final sample for the analysis, after individuals  
167 with missing values in the *APOE* predictor and the covariates were removed (see  
168 below).

## 169 **2.3 Predictors**

### 170 **2.3.1 Polygenic risk scores**

171 Polygenic Risk Scores (PRS) were used as a risk factor representing the  
172 aggregated genome-wide genetic effect contributing to AD. PRS are calculated  
173 for each individual as a sum of their genome-wide risk alleles, weighted by each  
174 allele's effect size to the outcome (here AD status)<sup>14</sup>. For AD-PRS calculation, the  
175 allele effect sizes were obtained from the largest to-date European GWAS on AD,  
176 totalling up to 85,934 AD patients (Bellenguez et al, 2022)<sup>5</sup>. AD was chosen, as  
177 this is the dementia sub-type for which the largest GWAS has been conducted,  
178 and the most frequent dementia sub-type in the general population and the  
179 present sample (48.6%, Supplementary Table 1).

180 The PRSice2 (v2.3.5) software<sup>38</sup> was used to calculate the AD-PRS. PRSice2  
181 uses the "clumping and thresholding" technique<sup>14</sup>. This means that the total  
182 number of SNPs is thinned down to retain only SNPs that are independent from  
183 each other (clumping) and significantly associated with the outcome  
184 (thresholding). Furthermore, the *APOE* region (chromosome 19, base pair



185 44,000,000 to 46,500,000<sup>11</sup>, in the human reference genome GRCh37  
186 coordinates) was removed before the calculation of the AD-PRS (see “*APOE*  $\epsilon$ 4  
187 alleles” section). Finally, AD-PRS were calculated for the 759 participants with  
188 non-missing data, using 981 genome-wide AD associated SNPs at a p-value  
189 threshold of  $< 0.0002$ .

### 190 **2.3.2 *APOE* $\epsilon$ 4 alleles**

191 Given the strong effect of the *APOE*  $\epsilon$ 4 polymorphisms on dementia, it has been  
192 suggested for genomic analyses to treat *APOE* polymorphisms independently as  
193 a separate predictor<sup>10,11</sup>, as it can mask the effects of other genetic variants with  
194 weaker effects. The *APOE*  $\epsilon$ 4 polymorphism is thus included as a separate risk  
195 factor in the present analysis, defined as the number of  $\epsilon$ 4 alleles per individual  
196 (0, 1 or 2). Since 32 individuals did not have information on *APOE* status, they  
197 have been excluded from the analysis, as this is an important risk factor for  
198 dementia.

### 199 **2.3.3 Polypharmacy**

200 Polypharmacy was defined as the count of total or nervous system-acting drugs  
201 taken at baseline. Measurements were obtained using LBC1936 participants’  
202 medication data. For each wave of the LBC1936, medication data was based on  
203 participants’ prescription cards which were brought to the assessment centre and  
204 further inspected by the testing team. Data includes prescribed drugs (in their  
205 brand name or their generic name), over-the-counter drugs and dietary  
206 supplements. To ensure consistency, (e.g., no spelling mistakes, multiple brand  
207 names referring to the same drug), we applied several pre-processing steps in

208 order to code each drug name according to the Anatomical Therapeutic  
209 Chemical (ATC) classification system<sup>39</sup>. The ATC classification system classifies  
210 the active ingredient(s) of a drug in a 5-level hierarchical code, based on its  
211 acting organ/anatomical system and its therapeutic, pharmacological, or chemical  
212 properties.

213 Specifically, using only medication data from Wave 1 of LBC1936, the pre-  
214 processing steps included:

- 215 • Drugs in their brand names were searched in the British National  
216 Formulary (BNF) (<https://bnf.nice.org.uk/>)<sup>40</sup> and substituted with their  
217 generic name.
- 218 • Drugs in their generic name were inspected and corrected for spelling  
219 mistakes, also using the BNF website.
- 220 • Subsequently, for each drug's generic name, its corresponding ATC code  
221 was retrieved from the ATC classification system's online searchable  
222 database ([https://www.whocc.no/atc\\_ddd\\_index/](https://www.whocc.no/atc_ddd_index/))<sup>39</sup>. For drugs with  
223 multiple ATC codes (e.g., acting on more than one system), all available  
224 ATC codes were retrieved.
- 225 • The following entries were excluded from the analysis:
  - 226 ○ Drugs that could not be assigned to an ATC code
  - 227 ○ homeopathic substances
  - 228 ○ diet supplements
  - 229 ○ vitamins.
- 230 • Additionally, it was deemed appropriate to exclude topically applied  
231 dermatological drugs and those with ophthalmic, otic or nasal routes of

232 administration, as they are unlikely to have a systemic effect and interact  
233 with pathways affected by AD related genes.

234 After these pre-processing steps were applied, a “general” polypharmacy variable  
235 was defined as the total number of drugs taken at Wave 1. Additionally, a  
236 nervous-system-specific polypharmacy variable was defined as the number of  
237 drugs acting on the central nervous system, based on the corresponding ATC  
238 code (code starting with “N0”<sup>39</sup>).

#### 239 **2.3.4 Other covariates**

240 Apart from the PRS, *APOE* and polypharmacy variables, the following variables  
241 were included as covariates: sex, age, BMI, Scottish Index of Multiple Deprivation  
242 (SIMD) index, smoking status (non-, ex-, or current smoker), alcohol consumption  
243 status (yes or no), number of comorbidities (max 10). The number of  
244 comorbidities was calculated by summing the presence, at the time of Wave 1  
245 assessment, of self-reported diseases among: high blood pressure, diabetes,  
246 high cholesterol, history of cardiovascular disease, stroke, neoplasia, arthritis,  
247 Parkinson’s disease, thyroid disease, leg pain or other unspecified disease.  
248 Dates of death were identified via data linkage with the National Health Service  
249 Central Register, provided by National Records of Scotland. Participant deaths  
250 were flagged to the research team approximately every 12 weeks beginning at  
251 study baseline. Finally, to account for any residual genomic population  
252 stratification<sup>41</sup>, which could inflate the effect of the PRS, the 4 first genomic  
253 principal components of the individuals were included as covariates.

#### 254 **2.4 Outcome: incident dementia**

255 In a recent endeavour (as described here<sup>42,43</sup>), dementia outcomes have been  
256 ascertained for LBC1936 participants. Briefly, a multi-disciplinary team of clinical  
257 dementia experts provided consensus status for dementia and, when possible,  
258 dementia sub-types, for all consenting participants<sup>42</sup>. This process included a  
259 comprehensive review of participants' electronic health records and death  
260 certificates for the presence of dementia. Additionally, when deemed necessary,  
261 home visits to suspected dementia patients were conducted by a trained clinician.  
262 Finally, a consensus diagnostic review board of experts assessed the strength of  
263 evidence for each participant, and categorised each as having "probable",  
264 "possible", or "no" dementia, as well as each dementia subtype. The dementia  
265 and dementia subtype diagnoses were based on the International Classification  
266 of Diseases-11 criteria<sup>42,44</sup>. Furthermore, the age of onset has been reported as  
267 the earliest age for which any diagnosis was reported. Age of onset spanned a  
268 time period from approximately one year after attending Wave 1 attendance until  
269 mid-August 2022, when the ascertainment process ended<sup>42</sup>.

270 In the present analysis, only "probable" dementia diagnoses were considered,  
271 due to the lack of definite evidence for the assignment of a dementia diagnosis in  
272 participants with "possible" dementia<sup>42</sup>. The outcome used here was time-to-  
273 onset, the time period between Wave 1 assessment until all cause (non-subtype  
274 specific) dementia diagnosis in 105 participants.

## 275 **2.5 Statistical Analysis**

276 The aim of the present study was to determine the effect of AD-PRS, baseline  
277 polypharmacy, and their interaction on incident dementia over up to 17.5 years of  
278 follow-up. Given the longitudinal nature of the outcome, Cox proportional hazards

279 (Cox PH) models<sup>45</sup> were implemented. This type of modelling investigates the  
280 association between multiple predictors and the time that passes until an  
281 outcome event occurs<sup>46</sup> (here dementia).

282 In a further analysis, to account for the possible bias of individuals dying before  
283 exhibiting the main dementia outcome, the Fine-Gray competing risk model<sup>47,48</sup>  
284 was used. This extension of the Cox proportional hazards model estimates the  
285 effect of a predictor on the outcome of interest (dementia), given that a competing  
286 event has not happened yet (death)<sup>46</sup>. Mirroring the procedure from Mullin et al.  
287 (2023)<sup>43</sup>, for both analyses the time-to-event outcome variables were calculated  
288 as the time passing between Wave 1 assessment and the earliest of the  
289 following: (1) dementia diagnosis, if the individual was ascertained for dementia,  
290 (2) the individual's death, if the participant had died while dementia-free, or (3)  
291 end of ascertainment, if the individual was dementia-free and alive at the end of  
292 the ascertainment period (mid-August 2022). Statistical models were  
293 implemented using the predictors described previously ("Predictors" section), as  
294 well as the interaction between AD-PRS and the polypharmacy variables. The  
295 results of the models are in the form of Hazard Ratios (HR) with 95% confidence  
296 intervals (CI) for each tested predictor.

297 A null model that included only PRS and polypharmacy main effects, without their  
298 interaction was also implemented. The statistical analysis for those models was  
299 the same as described above.

300 As a sensitivity analysis, cox PH and competing risk models were also run using  
301 time to AD diagnosis as outcome (n=51), as described above for the all-cause  
302 dementia models.

303 All analyses were conducted using the R (v4.2.2) statistical software<sup>49</sup>, and the  
304 packages “survival”<sup>50</sup> for Cox PH models and “cmprsk”<sup>48</sup> for competing risk  
305 models.

306

## 307 **3 RESULTS**

### 308 **3.1 Sample characteristics**

309 After genotyping data cleaning and exclusion of individuals with missing values,  
310 the analysis sample consisted of 759 individuals. 105 individuals (13.8%) were  
311 diagnosed with dementia up to 17.5 years after follow-up from Wave 1. 51 of  
312 these individuals (6.7%) had an Alzheimer dementia diagnosis. Participants’  
313 characteristics at Wave 1 for all tested covariates are presented in Table 1.  
314 Participants’ mean age at Wave 1 was 69.5 (standard deviation=0.83) years,  
315 while the mean age-at-onset for dementia was 80.7 (3.7) years. The median time  
316 from baseline to dementia diagnosis for later patients was 11.8 years  
317 [interquartile range (IQR): 7.88-14.35]. 277 (49.5%) participants had passed  
318 away at the time of censoring,

319 Regarding polypharmacy, 164 (21.6%) of participants took 5 to 10 drugs at the  
320 time of Wave 1 testing, while 14 (1.8%) took more than 10 drugs simultaneously  
321 (excessive polypharmacy) (Sup. Table 2 and Sup. Figure 3), with a maximum of  
322 16 simultaneous drugs. The most abundant drugs by the anatomical system on  
323 which they act (according to the ATC classification system<sup>39</sup>), were those acting  
324 on the gastrointestinal system / metabolism (346 individuals taking at least 1,  
325 45.6%), cardiovascular system (388 individuals, 5.1%) and nervous system (321

326 individuals, 42.3%) (Sup. Table 2). In addition, individuals taking multiple  
327 medications acting on the same system are reported: 141 (18.6%) individuals  
328 taking 3 or more cardiovascular medications; 46 (6 %) individuals taking 3 or  
329 more gastrointestinal / metabolic medication; and 9 (1.2%) individuals with 3 or  
330 more nervous system active medications simultaneously (Table 1 and Sup. Table  
331 2).

332

333 Table 1: Descriptive statistics of LBC1936 at Wave 1.

334

| Variable                      | Level         | Mean (SD) or n (%) |
|-------------------------------|---------------|--------------------|
| <b>Sex</b>                    | Male          | 392 (51.6)         |
|                               | Female        | 368 (48.4)         |
| <b>Age (years)</b>            |               | 69.5 (0.83)        |
| <b>BMI (kg/m<sup>2</sup>)</b> |               | 27.8 (4.24)        |
| <b>SIMD index</b>             |               | 4709 (1836)        |
| <b>Smoking status</b>         | Never         | 368 (48.5)         |
|                               | Ex-Smoker     | 328 (43.2)         |
|                               | Current       | 64 (8.4)           |
| <b>Alcohol status</b>         | No            | 99 (13)            |
|                               | Yes (current) | 661 (87)           |
| <b>Comorbidities index</b>    |               | 3.1 (1.8)          |
| <b>APOE ε4 count</b>          | 0             | 531 (69.9)         |
|                               | 1             | 212 (27.9)         |
|                               | 2             | 17 (2.2)           |
| <b>No. of drugs</b>           |               | 2.9 (2.6)          |
| <b>No. NS-active of drugs</b> |               | 0.51 (0.68)        |
| <b>Dementia</b>               | No            | 654 (86.2)         |
|                               | Yes           | 105 (13.8)         |

335  
336  
337  
338  
339  
340  
341  
342  
343  
344  
345

Footn  
ote:  
BMI:  
Body  
Mass  
Index;  
SD:  
stand  
ard

346 deviation; n: number of individuals; SIMD: Scottish Index of Multiple Deprivation;  
 347 *APOE*: apolipoprotein E gene; NS-active no. of drugs: number of drugs that act  
 348 on the nervous system. Polygenic Risk Scores are not reported as they have  
 349 mean 0 and sd 1 by default. \*SIMD ranges from 4 (most deprived area) to 6505  
 350 (least deprived area).

351

352



### 353 **3.2 Main analysis**

354 The Cox PH models (unadjusted for death as competing risk) were run using  
355 dementia status as the time-to-event outcome variable and polypharmacy  
356 (number of drugs), Polygenic Risk Score (PRS) and their interaction  
357 (polypharmacy\*PRS) as predictors. The models were adjusted for the covariates:  
358 *APOE*  $\epsilon$ 4 count, age, sex, BMI, SIMD index, comorbidities index, alcohol status,  
359 smoking status and 4 first genomic principal components. The polypharmacy  
360 predictor was either the “general” polypharmacy (total number of drugs) or the  
361 nervous system active polypharmacy (number of drugs acting on the nervous  
362 system). Cox PH models utilising, among others, age at baseline, sex,  
363 comorbidities index and socioeconomic variable as predictors of dementia in  
364 LBC1936 have been reported by Mullin et al (2023)<sup>43</sup>. However, in this previous  
365 study motoric cognitive risk instead of polypharmacy / AD-PRS was the main  
366 predictor and Wave 3 was the baseline. Both here and in Mullin et al (2023)<sup>43</sup>  
367 these covariates had a non-significant effect on dementia risk.

368 The results for the “general” polypharmacy Cox PH model are presented in the  
369 Figure 1 forest plot. Only the *APOE*  $\epsilon$ 4 allele count significantly increased – more  
370 than tripled – the risk of incident dementia over the 17.5-year follow-up (HR =  
371 3.28; 95% CI: 2.38 – 4.54;  $p = 5.35 \times 10^{-13}$ ). Taking more drugs and having a high  
372 PRS both increased the risk of incident dementia, however, the effects were not  
373 significant. For number of drugs: HR = 1.04; 95% CI: 0.93 – 1.15;  $p = 0.517$ , and  
374 for PRS: HR = 1.15; 95% CI: 0.85 - 1.55;  $p = 0.376$ . The interaction effect  
375 between the number of drugs and PRS was in the direction of increased

376 dementia risk above that of their separate effects but was non-significant (HR =  
 377 1.06; 95% CI: 0.98 - 1.15; p = 0.135).

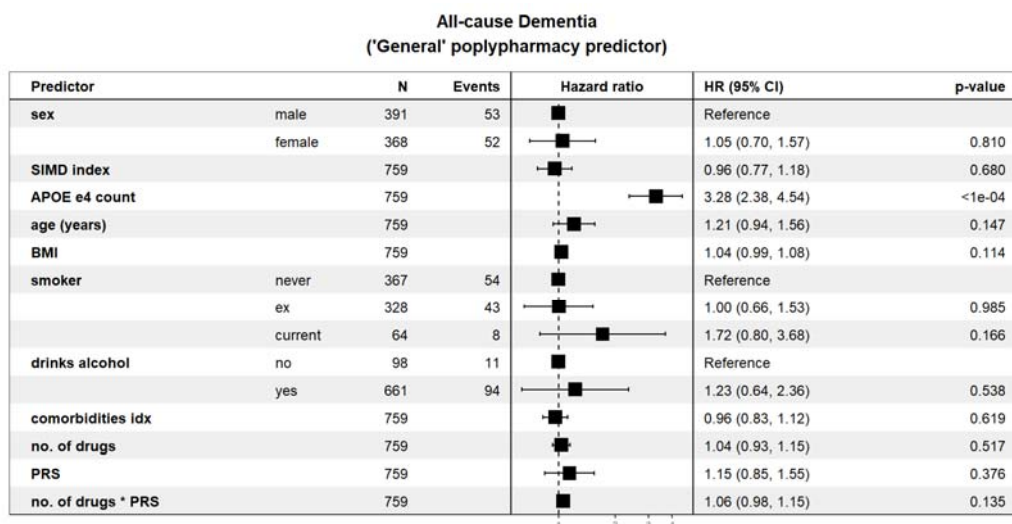

378 Figure 1: Forest plot showing the Cox PH model Hazard Ratios for each predictor's association  
 379 with all-cause incident dementia. The “no. of drugs” predictor includes all drugs taken by an  
 380 individual after data cleaning. HR for Genomic Principal Components are not shown for illustration  
 381 purposes, but were included in the model. The forest plot was produced using the “forestmodel” R  
 382 package. HR: Hazard Ratio; CI: Confidence Interval; PRS: Polygenic Risk Score; BMI: Body  
 383 Mass Index; SIMD: Scottish Index of Multiple Deprivation.

384

385 Figure 2 presents the association results for the Cox PH model that includes the  
 386 “nervous system active” polypharmacy predictor. The *APOE* ε4 predictor is,  
 387 again, a highly significant risk factor (HR = 3.36; 95% CI: 2.43 – 4.65); p =  
 388 2.63x10<sup>-13</sup>). This time, however, the number of nervous system active drugs  
 389 significantly increased the follow-up dementia risk (HR = 1.37; 95% CI: 1.02 –  
 390 1.84; p = 0.035). The positive effect of the PRS was, now, also significant (HR =  
 391 1.42; 95% CI: 1.10 – 1.82; p = 0.006). The interaction between the number of

392 nervous system active drugs and the PRS, however, had a non-significant  
 393 negative effect (HR = 0.95; 95% CI: 0.72 – 1.25; p = 0.707).

394

395

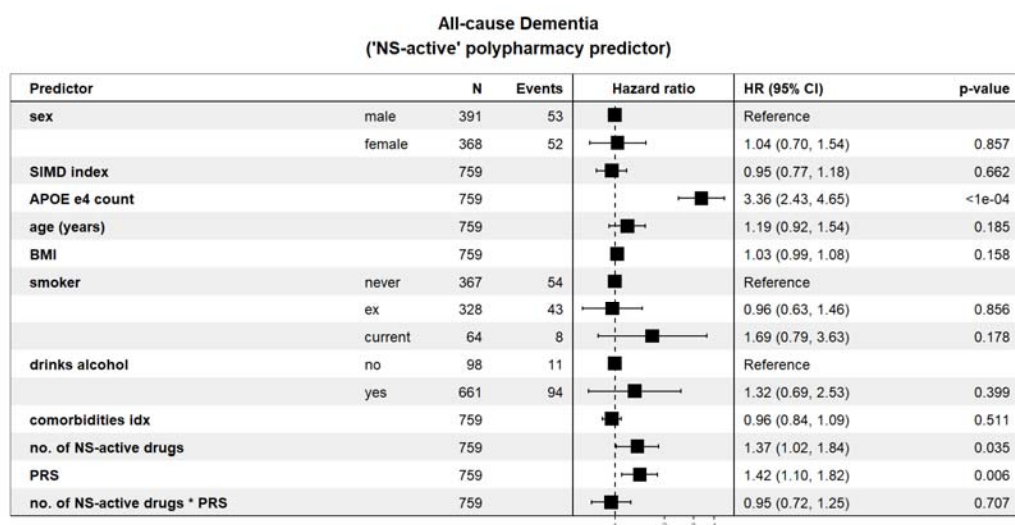

396 Figure 2: Forest plot showing the Cox PH model Hazard Ratios for each predictor's association  
 397 with all-cause incident dementia. The “no. of NS-active drugs” predictor includes drugs acting on  
 398 the nervous system taken by an individual. HR for Genomic Principal Components are not shown  
 399 for illustration purposes, but were included in the model. The forest plot was produced using the  
 400 “forestmodel” R package. HR: Hazard Ratio; CI: Confidence Interval; PRS: Polygenic Risk Score;  
 401 BMI: Body Mass Index; SIMD: Scottish Index of Multiple Deprivation; NS-active: nervous system-  
 402 active.

403

404 The main results of the Fine – Grey competing risk regression models, adjusting  
 405 for mortality as a competing risk of dementia, are presented in Figure 3. Models  
 406 were run for both the “general” polypharmacy predictor and the “nervous system-  
 407 active” polypharmacy, and their interaction with PRS, adjusting for the full set of

408 covariates. Results for the full list of covariates are presented in Sup. Figure 4.  
409 For the “general” polypharmacy model, the results were similar to the unadjusted  
410 model, with only the *APOE*  $\epsilon$ 4 predictor having a significant effect (HR = 3.38;  
411 95% CI: 2.46 – 4.66;  $p = 8.0 \times 10^{-14}$ ). “General” polypharmacy, PRS and their  
412 interaction all have small, positive, non-significant association with incident  
413 dementia, after adjusting for the risk of death (Figure 3, top). Regarding the  
414 “nervous system-active” polypharmacy model, the PRS genetic effect remained  
415 significant after accounting for death (HR = 1.42; 95% CI: 1.13 – 1.78;  $p =$   
416 0.0029), but the “nervous system-active” polypharmacy predictor marginally lost  
417 significance (HR = 1.27; 95% CI: 0.98 – 1.65;  $p = 0.068$ ). The PRS \* “ns-active”  
418 polypharmacy interaction was again nonsignificant (HR = 0.98; 95% CI: 0.78 –  
419 1.23;  $p = 0.86$ ) (Figure 3, bottom).

420 Because the interaction term was nonsignificant in both models, the mortality  
421 adjusted models were re-run omitting this term. Results showed that PRS had a  
422 significant positive effect on dementia risk in both general and NS-active  
423 polypharmacy models: HR(general) = 1.39; 95% CI: 1.15-1.67;  $p < 0.001$  and  
424 HR(NS-active) = 1.40; 95% CI: 1.16-1.69;  $p$ -value  $< 0.001$  respectively; and that  
425 polypharmacy effects were nonsignificant (Sup. Figure 5).

426 Using AD instead of all-cause dementia as outcome did not meaningfully alter the  
427 results of either the “general” or the “nervous system-active” polypharmacy  
428 models (Sup. Figure 6 and Sup. Figure 7 for AD-specific Cox PH models and  
429 Sup. Figure 8 for AD-specific competing risk regression models).

430

431

432

433

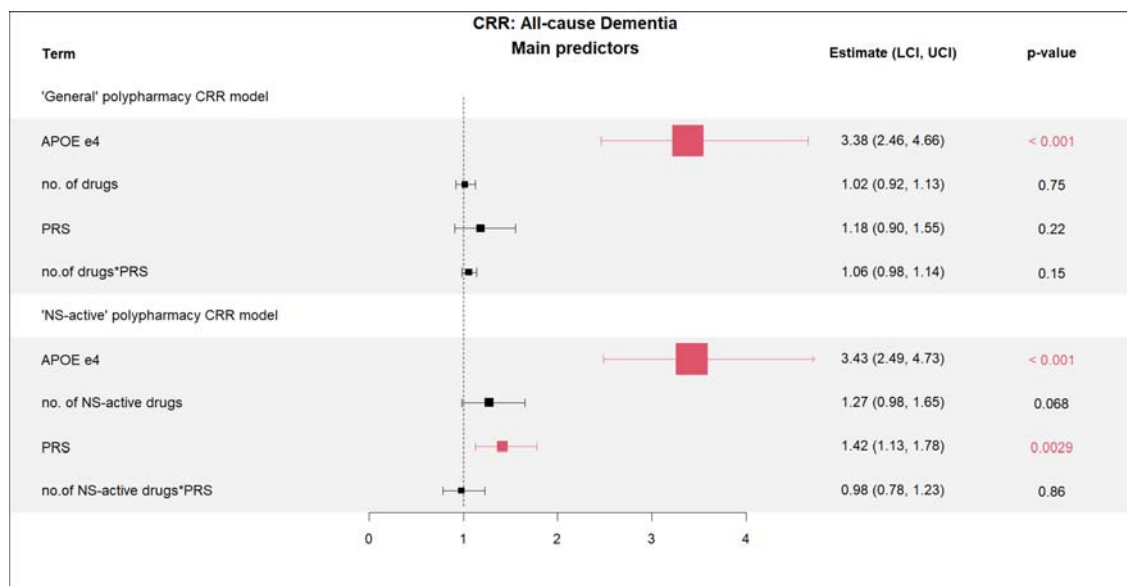

434

435 Figure 3: Forest plot showing the Competing Risk Regression models' Hazard Ratios for the  
436 association with all-cause incident dementia, adjusting for death as a competing risk. Only  
437 predictors of interest are shown here for illustration purposes, but the full set of predictors were  
438 included in the models. Upper figure shows the results for the model using the “general”  
439 polypharmacy variable (no. of drugs), whereas lower figure shows the results for the nervous-  
440 system active no. of drugs. The “Estimates” of the forest plot are Hazard Ratios (HR). CRR:  
441 Competing Risk Regression; UCI: Upper Confidence Interval; LCI: Lower Confidence Interval;  
442 PRS: Polygenic Risk Score; NS-active: nervous system-active. The forest plot was produced  
443 using the “forest” R package.

444

## 445 4 DISCUSSION

### 446 4.1 Interpretation of findings

447 This is the first study to assess the interaction between polypharmacy and  
448 dementia polygenic risk in shaping all-cause dementia risk. Here, higher  
449 polypharmacy exposure, higher polygenic risk (PRS), and their interaction were  
450 positively associated with increased dementia risk although only PRS was  
451 significant when main effects were considered. The positive direction of effect for  
452 the interaction between general polypharmacy and PRS is consistent with our  
453 hypothesis that the adverse effects of polypharmacy are modulated by adverse  
454 genetic effects which increases the risk of dementia over and above their  
455 separate effects. However, the nervous system acting polypharmacy interaction  
456 with genetic score had an almost zero non-significant effect. It is possible that the  
457 low variability of the predictor (only 9 people with 3 or more nervous system  
458 active medications) decreased accurate inferences.

459 Adjusting for death as a competing risk did not substantially change results,  
460 indicating that mortality did not affect the association between predictors and  
461 dementia. This was unexpected, given the high number of deaths in the sample:  
462 277 people in total and 220 people without dementia that could be potential  
463 patients otherwise. In these models, and omitting the nonsignificant  
464 polypharmacy x PRS interaction effect, the polygenic effect was significant in the  
465 hypothesised direction of increased dementia risk. General and NS-active  
466 polypharmacy main effects did not alter the risk of dementia, although the latter  
467 effect had a larger HR which approached significance indicating potential  
468 differences between types of medication used. In previous studies, PRS and  
469 polypharmacy have been often associated with dementia risk<sup>51</sup>, but they had not  
470 been modelled together. Our finding of non-significant polypharmacy effects

471 when controlling for AD polygenic risk might indicate that the previously reported  
472 polypharmacy effect on dementia is confounded by polygenic risk for the disease.  
473 However, this hypothesis may be difficult to prove using PRS. Here low  
474 correlation of AD-PRS with polypharmacy was observed (Pearson's  $r=0.041$ ),  
475 and, overall, polygenic scores for complex diseases explain little variation of  
476 drug-related phenotypes<sup>52</sup>. *APOE* status is frequently used as a proxy covariate  
477 for genetic susceptibility in studies of polypharmacy effects on dementia<sup>28,53</sup>, with  
478 polypharmacy regimes remaining significantly predictive of dementia risk after  
479 adjusting for *APOE* status<sup>28</sup>. One study found that polypharmacy lost significance  
480 after adjusting for *APOE* in a population of Aboriginal Australians<sup>54</sup>, although the  
481 polypharmacy effect size remained similar with its unadjusted value. Larger  
482 longitudinal studies of people with both low and high dementia polygenic risk and  
483 low and high polypharmacy use are needed to clarify the role of genetic  
484 confounding on polypharmacy effects.

485 The *APOE* gene was the only other covariate that had a significant effect on  
486 dementia. This was expected, given its strong and well established role in  
487 dementia and AD pathogenesis<sup>8</sup>. Other well established risk factors did not have  
488 a significant effect on dementia: BMI, alcohol intake, smoking, and deprivation  
489 index, although their effects' direction was expected<sup>1</sup>. Inadequate sample size is  
490 again a plausible explanation, coupled with restrictions of range in the variables  
491 stemming from selection bias in the LBC1936: participants are healthier and from  
492 higher socioeconomic status than the general population<sup>29</sup>.

493 In future, polypharmacy x polygenic interaction effects might be investigated with  
494 increased pathway specificity. For example, PRS calculated using only SNPs

495 pertaining to a certain biological pathway (e.g. synaptic processes)<sup>12</sup>. Testing  
496 whether sub-categories of polypharmacy measurements, such as the nervous  
497 system specific polypharmacy predictor, mask the effects of nervous system  
498 related pathway-specific PRS could shed light on whether those pathways are  
499 modulated by specific drugs. An important caveat, however, is that the predictive  
500 ability of pathway-specific PRS are potentially smaller than the genome-wide  
501 PRS, so it would be necessary to use large sufficiently powered samples<sup>12</sup>.

502 Furthermore, when studying polypharmacy, a direct interpretation of associations  
503 with outcomes is difficult as confounding by indication may be present<sup>28,55</sup>. This  
504 means that dementia may be caused not because of polypharmacy, but due to  
505 the comorbidities for which multiple drugs are taken. This can affect both the  
506 effects of polypharmacy exposure and the polypharmacy interaction with PRS.  
507 However, in the present study, the comorbidities index covariate was not  
508 significant and had negligible effect, indicating that the presence of comorbid  
509 health conditions did not affect dementia risk. This could be again arising due to  
510 small sample size, as per previous similar studies in LBC1936<sup>43</sup>. It could be  
511 informative to include separate health conditions that are established dementia  
512 risk factors as covariates (e.g., depression, diabetes, and hypertension) and not  
513 as part of the comorbidities index covariate. Then, again, small sample size  
514 would not allow for the excessive use of covariates, due to the risk of overfitting.

#### 515 **4.2 Strengths and limitations**

516 Several strengths can be identified for the present analysis. First, the high  
517 accuracy of the dementia ascertainment outcomes, being based on Electronic  
518 Health Records, clinical assessments and expert consensus<sup>42</sup>. This increases the



519 power to detect true associations with dementia risk, compared to non-curated  
520 dementia diagnoses. Secondly, the LBC1936 study design provides an  
521 appropriate dataset to study dementia, due to the older age of the participants  
522 (average of 69.5 years on baseline), extensive follow-up period (up to 17.5 years)  
523 and absence of dementia at baseline, allowing for the investigation of risk factors  
524 early on during disease development. Thirdly, LBC1936's thorough medication  
525 recording protocol, allowing the inclusion of both prescribed and over-the-counter  
526 medications in the polypharmacy predictors provides a more accurate picture of  
527 the medication state of the individuals. In other studies where polypharmacy is  
528 modelled, only prescribed drugs are included<sup>25,28</sup>, which may underestimate the  
529 true polypharmacy burden.

530 On the other hand, several limitations should be acknowledged. The major  
531 limitation of the study is the low sample size. Detecting genotype by environment  
532 interactions requires very large sample sizes, given their postulated small effect  
533 sizes<sup>3</sup>. Additionally, the definition of polypharmacy as the number of (systemic or  
534 nervous system acting) drugs taken at a certain time point (Wave 1 testing) is not  
535 optimal, as it lacks information on the duration of exposure and adherence to the  
536 medication. A better metric would be the number of daily drugs taken<sup>21</sup> and the  
537 time period, however no such information was available. Electronic Health  
538 Records data may allow for such modelling. Finally, only baseline (Wave 1)  
539 information for all predictors was used (polypharmacy, covariates). Cumulatively  
540 incorporating the changes in the predictors over time until dementia diagnosis  
541 would improve the power to detect true associations. That is, using information  
542 from later waves to construct time-varying predictor variables in the Cox PH

543 models is a sensible future direction for better delineating polypharmacy  
544 trajectories.

545

## 546 **5 CONCLUSIONS**

547 In summary, in the present analysis it was hypothesised that the detrimental  
548 effect of polypharmacy on dementia is modulated by one's genetic profile, with  
549 high genetic risk exacerbating adverse polypharmacy effects. This interaction  
550 effect was not supported for general polypharmacy or nervous system acting  
551 polypharmacy. AD polygenic scores were associated with increased risk of  
552 dementia, and there was suggestion that nervous system active drugs had  
553 independent polypharmacy effects on dementia risk. Better characterising how  
554 polypharmacy exerts adverse effects on individuals with high or low dementia  
555 genetic risk may point towards supporting the case for de-prescribing  
556 inappropriate medications in older adults dependent on one's genetic risk  
557 towards dementia.

558

## 559 **ACKNOWLEDGEMENTS**

560 We are thankful to Dr. Sarah Harris and Dr. Jure Mur for the insightful  
561 discussions on various topics of the project and LBC1936, and to Paul Redmond  
562 and Dr. Gail Davies for guidance and assistance on data access.

563 This research was funded by the Legal & General Group (research grant to  
564 establish the independent Advanced Care Research Centre at University of

565 Edinburgh). The funder had no role in conduct of the study, interpretation or the  
566 decision to submit for publication. The views expressed are those of the authors  
567 and not necessarily those of Legal & General. The LBC1936 study is supported  
568 by the Biotechnology and Biological Sciences Research Council (BBSRC) and  
569 the ESRC (BB/W008793/1), Age UK (Disconnected Mind project), the Milton  
570 Damerel Trust, and the University of Edinburgh. SRC was supported by a Sir  
571 Henry Dale Fellowship jointly funded by the Wellcome Trust and the Royal  
572 Society (221890/Z/20/Z). The Lothian Birth Cohort 1936 study acknowledges the  
573 financial support of NHS Research Scotland (NRS), through Edinburgh Clinical  
574 Research Facility. We gratefully acknowledge the contributions of the LBC1936  
575 participants and members of the LBC1936 research team who collect and  
576 manage the LBC data.

577 All authors declare no competing interests.

578

## 579 REFERENCES

580

- 581 1. Livingston G, Huntley J, Liu KY, et al. Dementia prevention, intervention, and care: 2024  
582 report of the Lancet standing Commission. *The Lancet*. 2024;404(10452):572-628.  
583 doi:10.1016/S0140-6736(24)01296-0
- 584 2. Lourida I, Hannon E, Littlejohns TJ, et al. Association of Lifestyle and Genetic Risk With  
585 Incidence of Dementia. *JAMA*. 2019;322(5):430. doi:10.1001/jama.2019.9879
- 586 3. Dunn AR, O'Connell KMS, Kaczorowski CC. Gene-by-environment interactions in Alzheimer's  
587 disease and Parkinson's disease. *Neuroscience & Biobehavioral Reviews*. 2019;103:73-80.  
588 doi:10.1016/j.neubiorev.2019.06.018
- 589 4. Reitz C, Mayeux R. Alzheimer disease: Epidemiology, diagnostic criteria, risk factors and  
590 biomarkers. *Biochemical Pharmacology*. 2014;88(4):640-651. doi:10.1016/j.bcp.2013.12.024
- 591 5. Bellenguez C. New insights into the genetic etiology of Alzheimer's disease and related  
592 dementias. *Nature Genetics*. 2022;54.

- 593 6. Alzheimer Disease Genetics Consortium (ADGC), The European Alzheimer's Disease Initiative  
594 (EADI), Cohorts for Heart and Aging Research in Genomic Epidemiology Consortium  
595 (CHARGE), et al. Genetic meta-analysis of diagnosed Alzheimer's disease identifies new risk  
596 loci and implicates A $\beta$ , tau, immunity and lipid processing. *Nat Genet.* 2019;51(3):414-430.  
597 doi:10.1038/s41588-019-0358-2
- 598 7. Gatz M, Reynolds CA, Fratiglioni L, et al. Role of Genes and Environments for Explaining  
599 Alzheimer Disease. *Arch Gen Psychiatry.* 2006;63(2):168. doi:10.1001/archpsyc.63.2.168
- 600 8. Liu CC, Kanekiyo T, Xu H, Bu G. Apolipoprotein E and Alzheimer disease: risk, mechanisms  
601 and therapy. *Nat Rev Neurol.* 2013;9(2):106-118. doi:10.1038/nrneurol.2012.263
- 602 9. Gharbi-Meliani A, Dugravot A, Sabia S, et al. The association of APOE  $\epsilon$ 4 with cognitive  
603 function over the adult life course and incidence of dementia: 20 years follow-up of the  
604 Whitehall II study. *Alz Res Therapy.* 2021;13(1):5. doi:10.1186/s13195-020-00740-0
- 605 10. Ware EB, Faul JD, Mitchell CM, Bakulski KM. Considering the APOE locus in Alzheimer's  
606 disease polygenic scores in the Health and Retirement Study: a longitudinal panel study.  
607 *BMC Med Genomics.* 2020;13(1):164. doi:10.1186/s12920-020-00815-9
- 608 11. Leonenko G, Baker E, Stevenson-Hoare J, et al. Identifying individuals with high risk of  
609 Alzheimer's disease using polygenic risk scores. *Nat Commun.* 2021;12(1):4506.  
610 doi:10.1038/s41467-021-24082-z
- 611 12. Harrison JR, Mistry S, Muskett N, Escott-Price V. From Polygenic Scores to Precision  
612 Medicine in Alzheimer's Disease: A Systematic Review. Brookes K, ed. *JAD.* 2020;74(4):1271-  
613 1283. doi:10.3233/JAD-191233
- 614 13. Seto M, Weiner RL, Dumitrescu L, Hohman TJ. Protective genes and pathways in Alzheimer's  
615 disease: moving towards precision interventions. *Mol Neurodegeneration.* 2021;16(1):29.  
616 doi:10.1186/s13024-021-00452-5
- 617 14. Choi SW, Mak TSH, O'Reilly PF. Tutorial: a guide to performing polygenic risk score analyses.  
618 *Nat Protoc.* 2020;15(9):2759-2772. doi:10.1038/s41596-020-0353-1
- 619 15. Jin X, Shu C, Zeng Y, Liang L, Ji JS. Interaction of greenness and polygenic risk score of  
620 Alzheimer's disease on risk of cognitive impairment. *Science of The Total Environment.*  
621 2021;796:148767. doi:10.1016/j.scitotenv.2021.148767
- 622 16. Huang TL, Zandi PP, Tucker KL, et al. Benefits of fatty fish on dementia risk are stronger for  
623 those without APOE  $\epsilon$ 4. *Neurology.* 2005;65(9):1409-1414.  
624 doi:10.1212/01.wnl.0000183148.34197.2e
- 625 17. Licher S, Ahmad S, Karamujić-Čomić H, et al. Genetic predisposition, modifiable-risk-factor  
626 profile and long-term dementia risk in the general population. *Nat Med.* 2019;25(9):1364-  
627 1369. doi:10.1038/s41591-019-0547-7
- 628 18. Kivipelto M, Rovio S, Ngandu T, et al. Apolipoprotein E  $\epsilon$ 4 magnifies lifestyle risks for  
629 dementia: a population-based study. *Journal of Cellular and Molecular Medicine.*  
630 2008;12(6b):2762-2771. doi:10.1111/j.1582-4934.2008.00296.x

- 631 19. Solomon A, Turunen H, Ngandu T, et al. Effect of the Apolipoprotein E Genotype on  
632 Cognitive Change During a Multidomain Lifestyle Intervention: A Subgroup Analysis of a  
633 Randomized Clinical Trial. *JAMA Neurol.* 2018;75(4):462. doi:10.1001/jamaneurol.2017.4365
- 634 20. Rovio S, K reholt I, Helkala EL, et al. Leisure-time physical activity at midlife and the risk of  
635 dementia and Alzheimer’s disease. *The Lancet Neurology.* 2005;4(11):705-711.  
636 doi:10.1016/S1474-4422(05)70198-8
- 637 21. Masnoon N, Shakib S, Kalisch-Ellett L, Caughey GE. What is polypharmacy? A systematic  
638 review of definitions. *BMC Geriatr.* 2017;17(1):230. doi:10.1186/s12877-017-0621-2
- 639 22. Esumi S, Ushio S, Zamami Y. Polypharmacy in Older Adults with Alzheimer’s Disease.  
640 *Medicina.* 2022;58(10):1445. doi:10.3390/medicina58101445
- 641 23. Fried TR, O’Leary J, Towle V, Goldstein MK, Trentalange M, Martin DK. Health Outcomes  
642 Associated with Polypharmacy in Community-Dwelling Older Adults: A Systematic Review. *J*  
643 *Am Geriatr Soc.* 2014;62(12):2261-2272. doi:10.1111/jgs.13153
- 644 24. Bushardt R. Polypharmacy: Misleading, but manageable. *CIA.* 2008;Volume 3:383-389.  
645 doi:10.2147/CIA.S2468
- 646 25. Park HY, Park JW, Song HJ, Sohn HS, Kwon JW. The Association between Polypharmacy and  
647 Dementia: A Nested Case-Control Study Based on a 12-Year Longitudinal Cohort Database in  
648 South Korea. Laks J, ed. *PLoS ONE.* 2017;12(1):e0169463. doi:10.1371/journal.pone.0169463
- 649 26. Clague F, Mercer SW, McLean G, Reynish E, Guthrie B. Comorbidity and polypharmacy in  
650 people with dementia: insights from a large, population-based cross-sectional analysis of  
651 primary care data. *Age Ageing.* Published online October 13, 2016:ageing;afw176v1.  
652 doi:10.1093/ageing/afw176
- 653 27. Mueller C, Molokhia M, Perera G, et al. Polypharmacy in people with dementia: Associations  
654 with adverse health outcomes. *Experimental Gerontology.* 2018;106:240-245.  
655 doi:10.1016/j.exger.2018.02.011
- 656 28. Mur J, Russ TC, Cox SR, Marioni RE, Muniz-Terrera G. Association between anticholinergic  
657 burden and dementia in UK Biobank. *A&D Transl Res & Clin Interv.* 2022;8(1):e12290.  
658 doi:10.1002/trc2.12290
- 659 29. Taylor AM, Pattie A, Deary IJ. Cohort Profile Update: The Lothian Birth Cohorts of 1921 and  
660 1936. *International Journal of Epidemiology.* 2018;47(4):1042-1042r. doi:10.1093/ije/dyy022
- 661 30. *The Trend of Scottish Intelligence: A Comparison of the 1947 and 1932 Surveys of the*  
662 *Intelligence of Eleven-Year-Old Pupils.* University London Press; 1949:xxviii, 151.
- 663 31. Deary IJ, Whalley LJ, Starr JM. A lifetime of intelligence: Follow-up studies of the Scottish  
664 mental surveys of 1932 and 1947. *A lifetime of intelligence: Follow-up studies of the Scottish*  
665 *mental surveys of 1932 and 1947.* Published online 2009:xvi, 285-xvi, 285.  
666 doi:10.1037/11857-000
- 667 32. Deary IJ, Gow AJ, Pattie A, Starr JM. Cohort Profile: The Lothian Birth Cohorts of 1921 and  
668 1936. *International Journal of Epidemiology.* 2012;41(6):1576-1584. doi:10.1093/ije/dyr197

- 669 33. Houlihan LM, Davies G, Tenesa A, et al. Common Variants of Large Effect in F12, KNG1, and  
670 HRG Are Associated with Activated Partial Thromboplastin Time. *The American Journal of*  
671 *Human Genetics*. 2010;86(4):626-631. doi:10.1016/j.ajhg.2010.02.016
- 672 34. the Haplotype Reference Consortium. A reference panel of 64,976 haplotypes for genotype  
673 imputation. *Nat Genet*. 2016;48(10):1279-1283. doi:10.1038/ng.3643
- 674 35. Weale ME. Quality Control for Genome-Wide Association Studies. In: Barnes MR, Breen G,  
675 eds. *Genetic Variation*. Vol 628. Methods in Molecular Biology. Humana Press; 2010:341-  
676 372. doi:10.1007/978-1-60327-367-1\_19
- 677 36. Chang CC, Chow CC, Tellier LC, Vattikuti S, Purcell SM, Lee JJ. Second-generation PLINK:  
678 rising to the challenge of larger and richer datasets. *GigaSci*. 2015;4(1):7.  
679 doi:10.1186/s13742-015-0047-8
- 680 37. Purcell SM, Chang CC. PLINK v1.9. [www.cog-genomics.org/plink/1.9/](http://www.cog-genomics.org/plink/1.9/)
- 681 38. Choi SW, O'Reilly PF. PRSice-2: Polygenic Risk Score software for biobank-scale data.  
682 *GigaScience*. 2019;8(7):giz082. doi:10.1093/gigascience/giz082
- 683 39. ATC/DDD Index 2023. WHO Collaborating Centre for Drug Statistics Methodology. Accessed  
684 January 7, 2023. [https://www.whocc.no/atc\\_ddd\\_index/](https://www.whocc.no/atc_ddd_index/)
- 685 40. British National Formulary (BNF). National Institute for Health and Care Excellence (NICE).  
686 Accessed January 7, 2023. <https://bnf.nice.org.uk/>
- 687 41. Uffelmann E, Huang QQ, Munung NS, et al. Genome-wide association studies. *Nat Rev*  
688 *Methods Primers*. 2021;1(1):59. doi:10.1038/s43586-021-00056-9
- 689 42. Mullin DS, Stirland LE, Buchanan E, et al. Identifying dementia using medical data linkage in a  
690 longitudinal cohort study: Lothian Birth Cohort 1936. *BMC Psychiatry*. 2023;23(1):303.  
691 doi:10.1186/s12888-023-04797-7
- 692 43. Mullin DS, Gadd D, Russ TC, Luciano M, Muniz-Terrera G. Motoric cognitive risk syndrome  
693 trajectories and incident dementia over 10 years. *Cerebral Circulation - Cognition and*  
694 *Behavior*. 2023;5:100178. doi:10.1016/j.cccb.2023.100178
- 695 44. International Classification of Diseases, Eleventh Revision (ICD-11), World Health  
696 Organization (WHO) 2019/2021. <https://icd.who.int/en>
- 697 45. Cox DR. Regression Models and Life-Tables. *Journal of the Royal Statistical Society Series B*  
698 *(Methodological)*. 1972;34(2):187-220.
- 699 46. Kalbfleisch JD, Schaubel DE. Fifty Years of the Cox Model. *Annu Rev Stat Appl*. 2023;10(1):1-  
700 23. doi:10.1146/annurev-statistics-033021-014043
- 701 47. Austin PC, Fine JP. Practical recommendations for reporting Fine-Gray model analyses for  
702 competing risk data. *Statistics in Medicine*. 2017;36(27):4391-4400. doi:10.1002/sim.7501
- 703 48. Fine JP, Gray RJ. A Proportional Hazards Model for the Subdistribution of a Competing Risk.  
704 *Journal of the American Statistical Association*. 1999;94(446):496-509.  
705 doi:10.1080/01621459.1999.10474144

- 706 49. R Core Team. R: A language and environment for statistical computing. Published online  
707 2022. <https://www.R-project.org/>
- 708 50. Therneau T. A Package for Survival Analysis in R. [https://CRAN.R-](https://CRAN.R-project.org/package=survival)  
709 [project.org/package=survival](https://CRAN.R-project.org/package=survival)
- 710 51. Leelakanok N, D’Cunha RR. Association between polypharmacy and dementia – A systematic  
711 review and metaanalysis. *Aging & Mental Health*. 2019;23(8):932-941.  
712 doi:10.1080/13607863.2018.1468411
- 713 52. Simona A, Song W, Bates DW, Samer CF. Polygenic risk scores in pharmacogenomics:  
714 opportunities and challenges—a mini review. *Front Genet*. 2023;14:1217049.  
715 doi:10.3389/fgene.2023.1217049
- 716 53. Gray SL, Anderson ML, Dublin S, et al. Cumulative Use of Strong Anticholinergics and  
717 Incident Dementia: A Prospective Cohort Study. *JAMA Intern Med*. 2015;175(3):401.  
718 doi:10.1001/jamainternmed.2014.7663
- 719 54. Lavrencic LM, Delbaere K, Broe GA, et al. Dementia Incidence, *APOE* Genotype, and Risk  
720 Factors for Cognitive Decline in Aboriginal Australians: A Longitudinal Cohort Study.  
721 *Neurology*. 2022;98(11). doi:10.1212/WNL.00000000000013295
- 722 55. Kyriacou DN, Lewis RJ. Confounding by Indication in Clinical Research. *JAMA*.  
723 2016;316(17):1818. doi:10.1001/jama.2016.16435
- 724
